# Supplementary material for: Repurposing the selective estrogen receptor modulator bazedoxifene to suppress gastrointestinal cancer growth
Source: PubMed Central journal article supplement (PMC6460354; doi:10.15252/emmm.201809539), 2019-03-18
Supplement: EMMM-11-e9539-s003.pdf [file EMMM-11-e9539-s003.pdf]

## **Source Data**

**Repurposing the selective estrogen receptor modulator  
*bazedoxifene* to suppress gastrointestinal cancer growth**

Thilakasiri *et al*

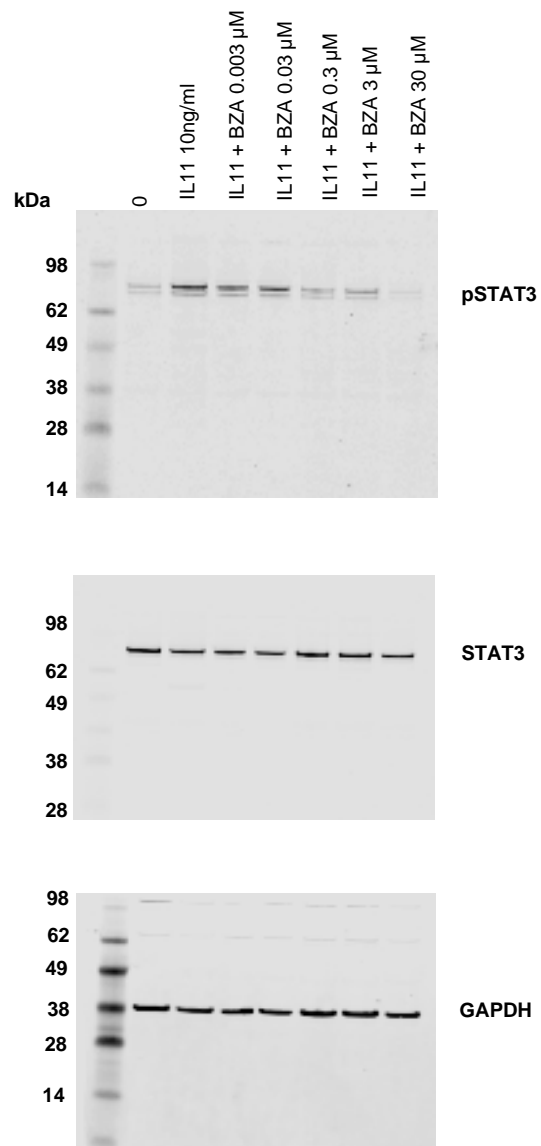

Thilakasiri *et al* **Figure 3A** IL11 stimulation of MKN1 cell line.

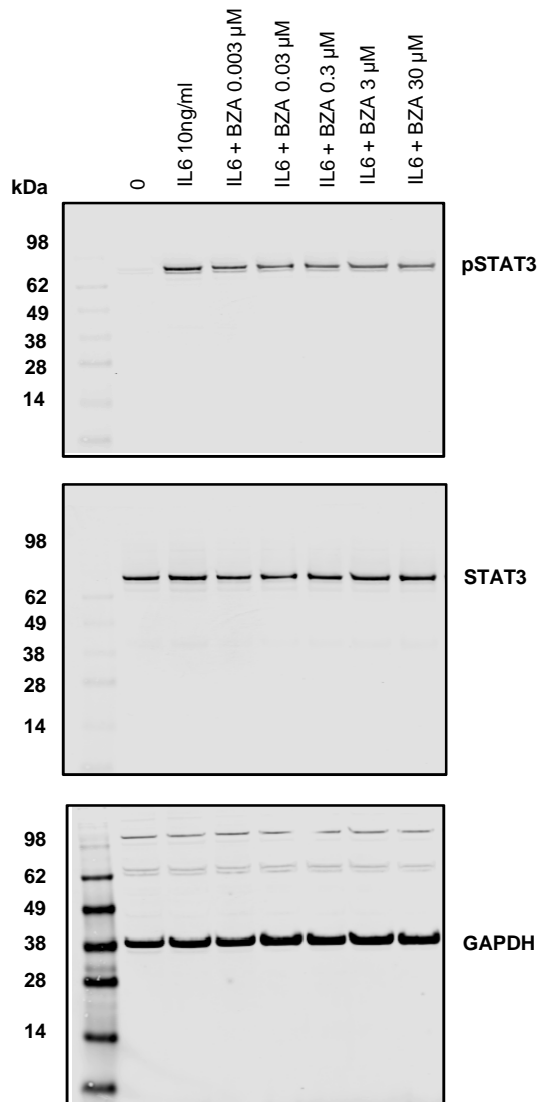

Thilakasiri *et al* **Figure 3A** IL6 stimulation of MKN1 cell line.

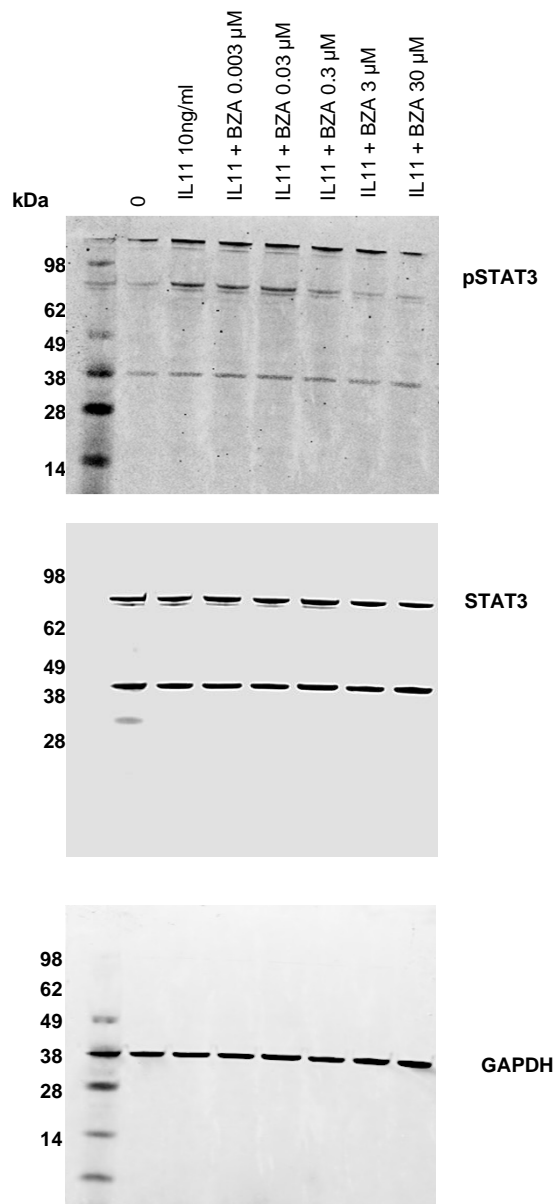

Thilakasiri *et al* **Figure 3A** IL11 stimulation of LIM2405 cell line.

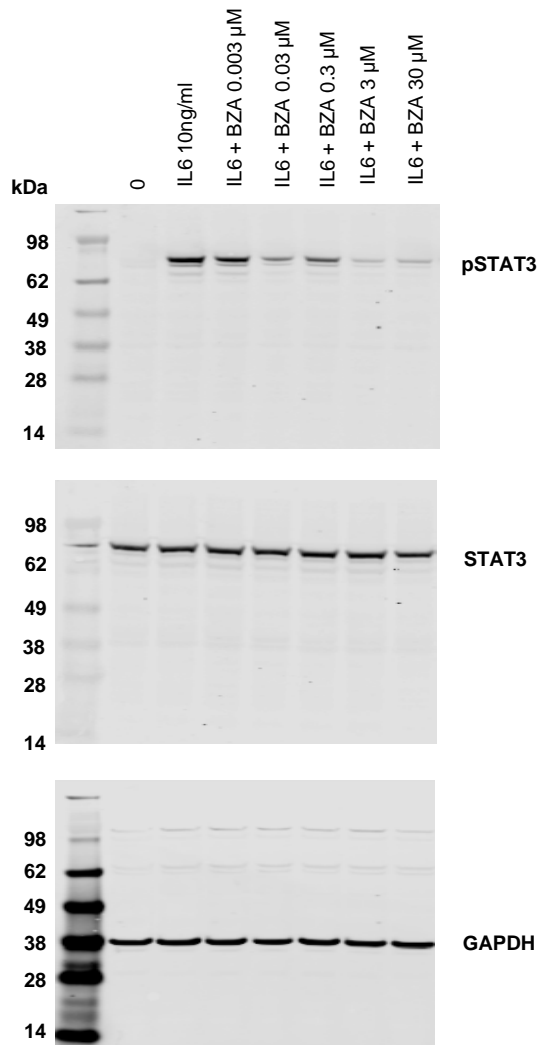

Thilakasiri *et al* **Figure 3A** IL6 stimulation of LIM2405 cell line.

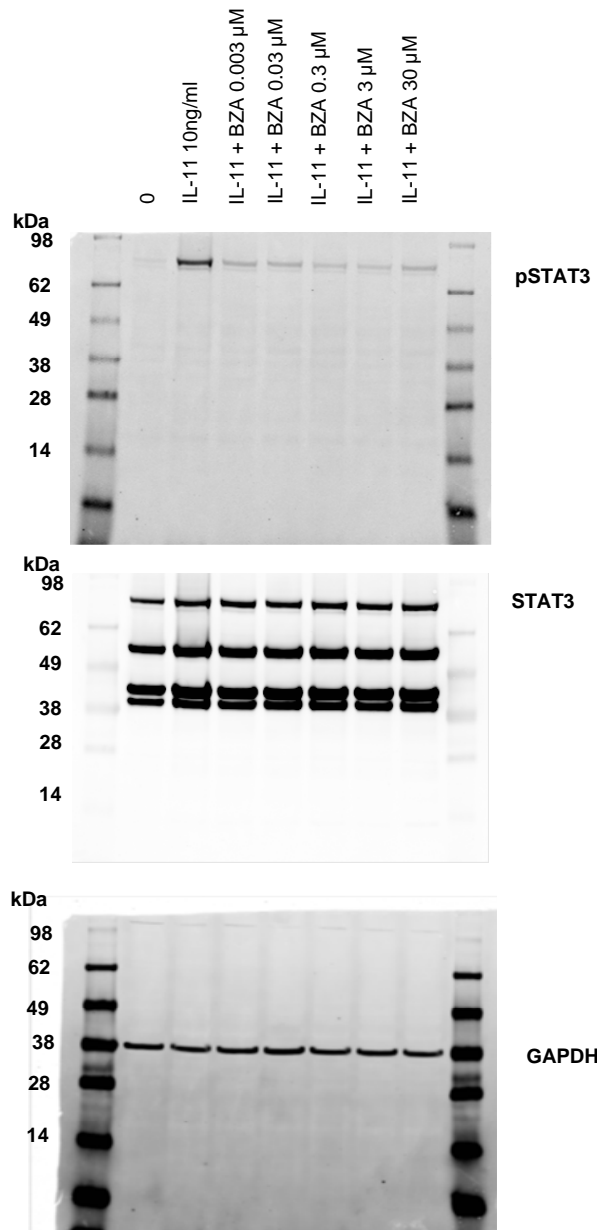

Thilakasiri *et al* **Figure 3A** IL11 stimulation of MDA-MB231 cell line.

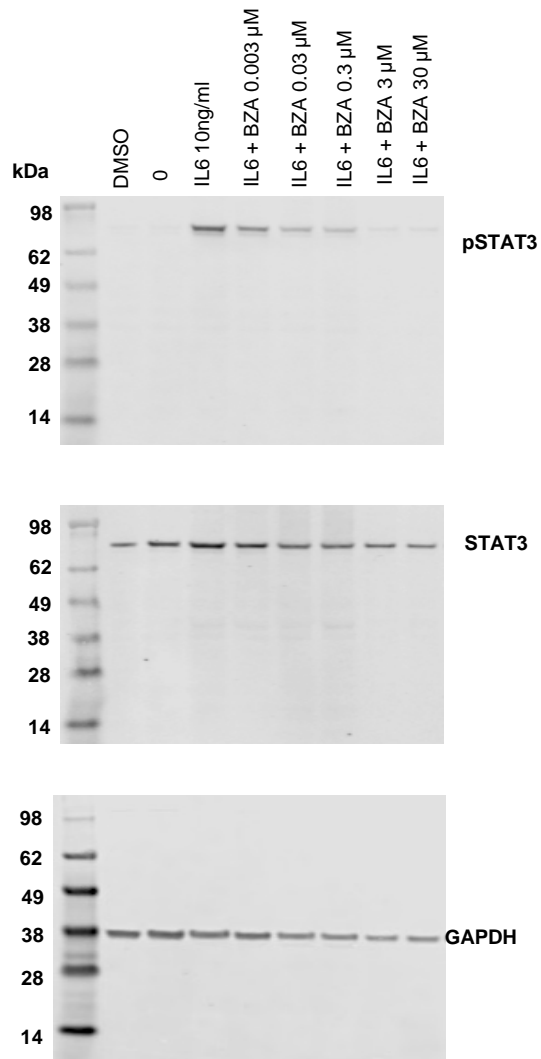

Thilakasiri *et al* **Figure 3A** IL6 stimulation of MDA-MB231 cell line.

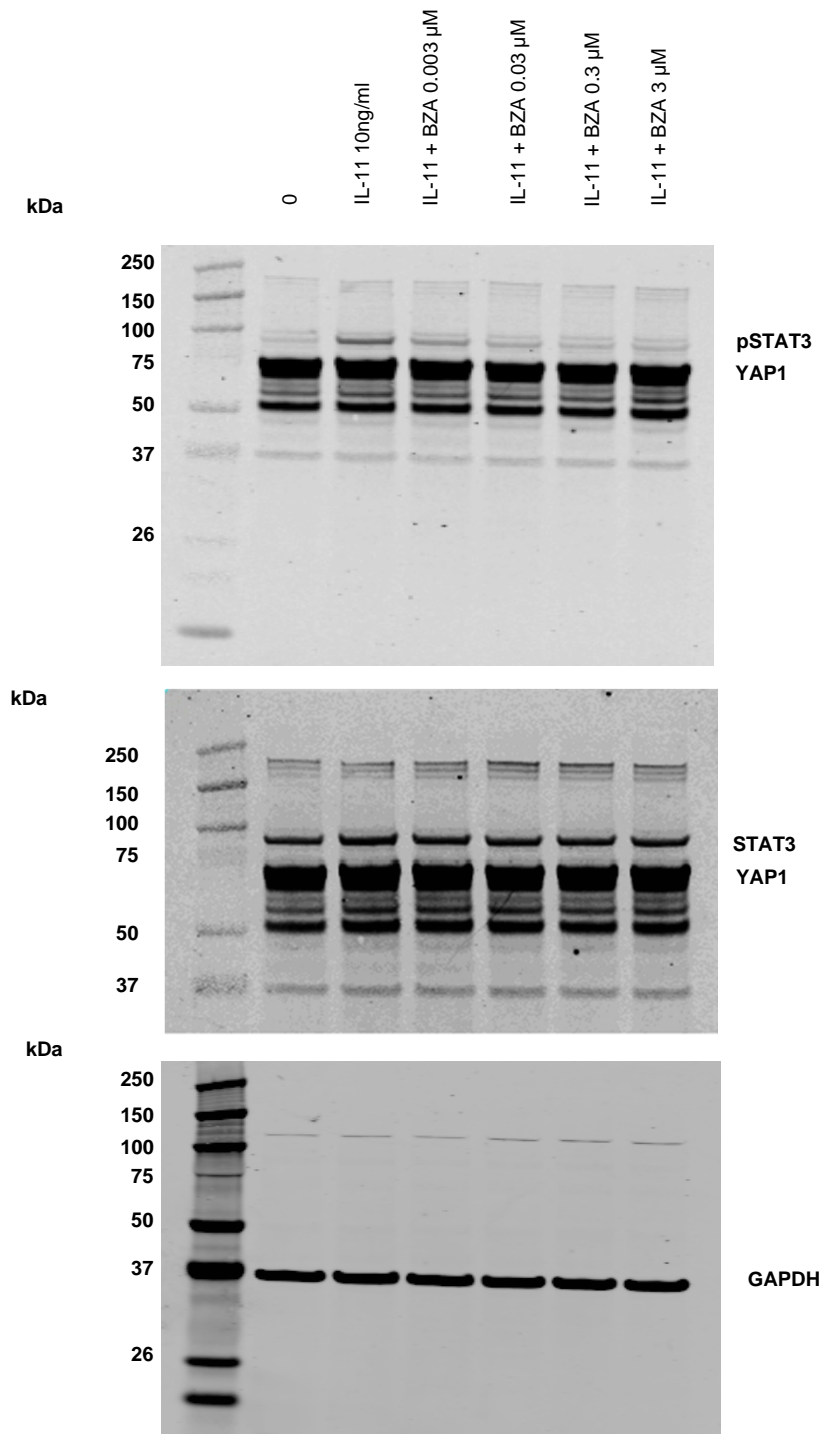

Thilakasiri *et al* **Figure 3B** IL11 stimulation of CRC1 cells.



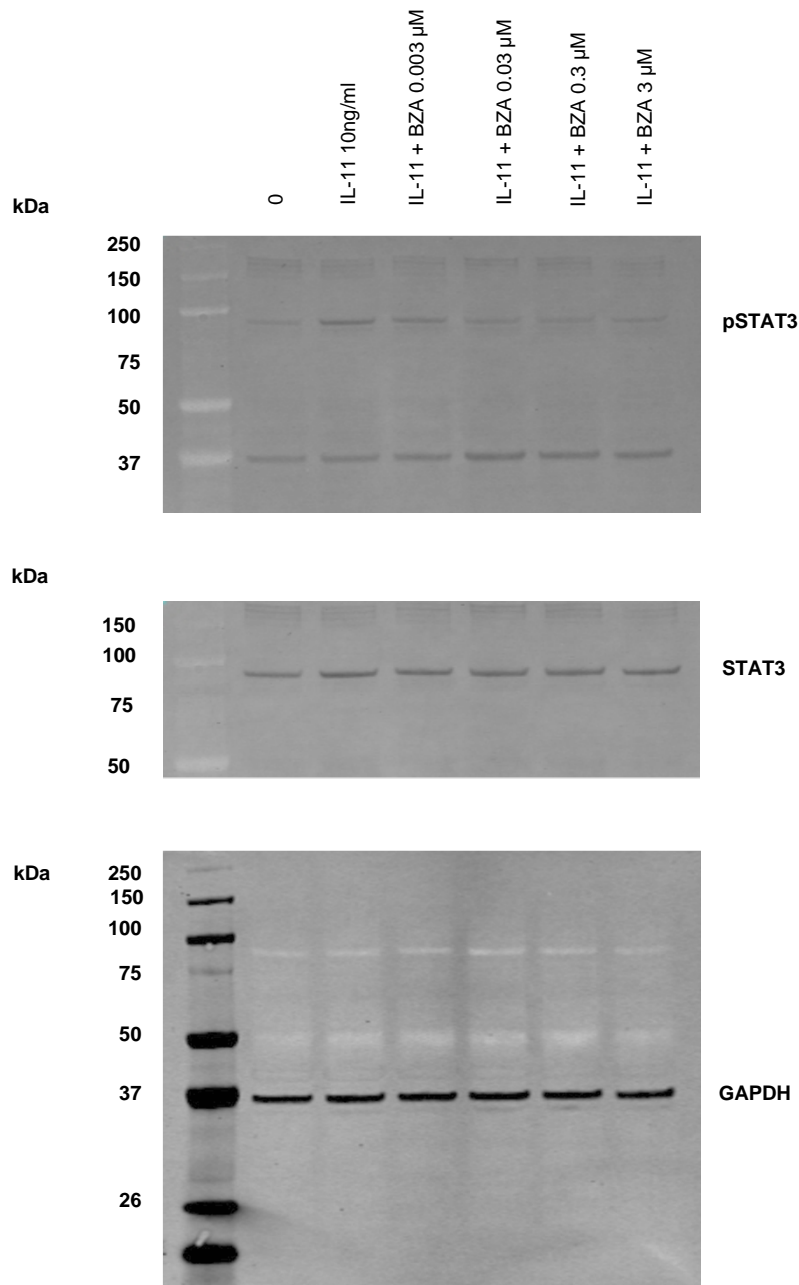

Thilakasiri *et al* **Figure 3B** IL11 stimulation of CRC2 cells.

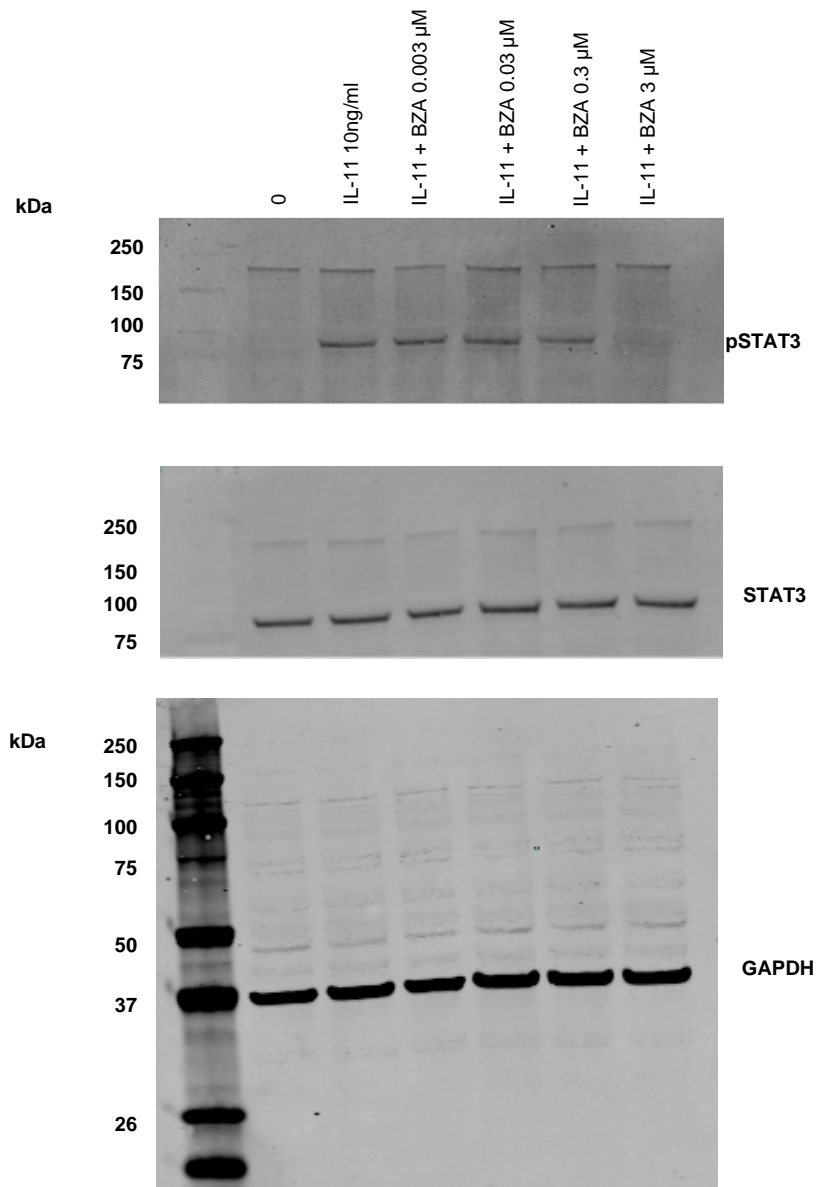

Thilakasiri *et al* **Figure 3B** IL11 stimulation of CRC3 cells.
