# Supplementary material for: Repurposing the selective estrogen receptor modulator bazedoxifene to suppress gastrointestinal cancer growth
Source: PubMed Central journal article supplement (PMC6460354; doi:10.15252/emmm.201809539), 2019-03-18
Supplement: EMMM-11-e9539-s005.pdf [file EMMM-11-e9539-s005.pdf]

## Source Data

**Repurposing the selective estrogen receptor modulator  
*bazedoxifene* to suppress gastrointestinal cancer growth**

Thilakasiri *et al*

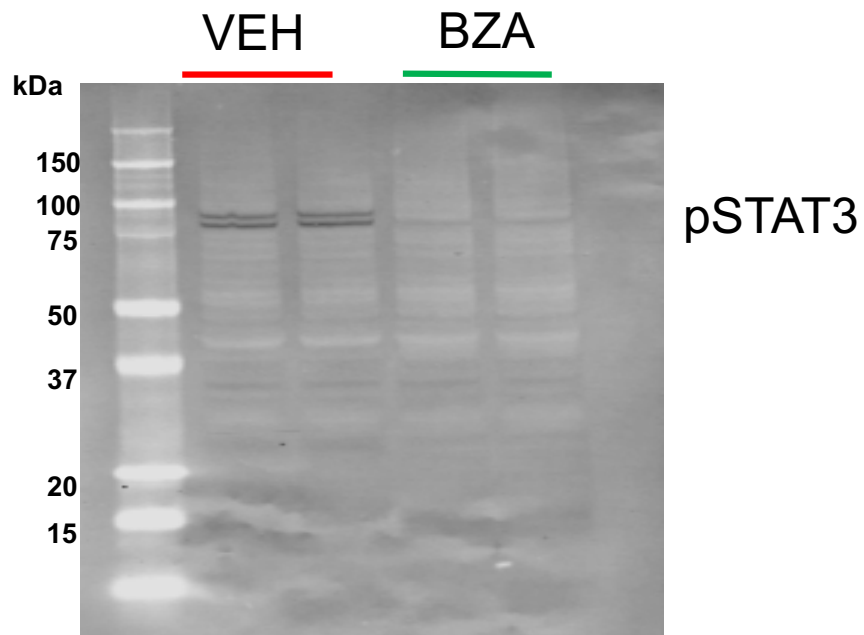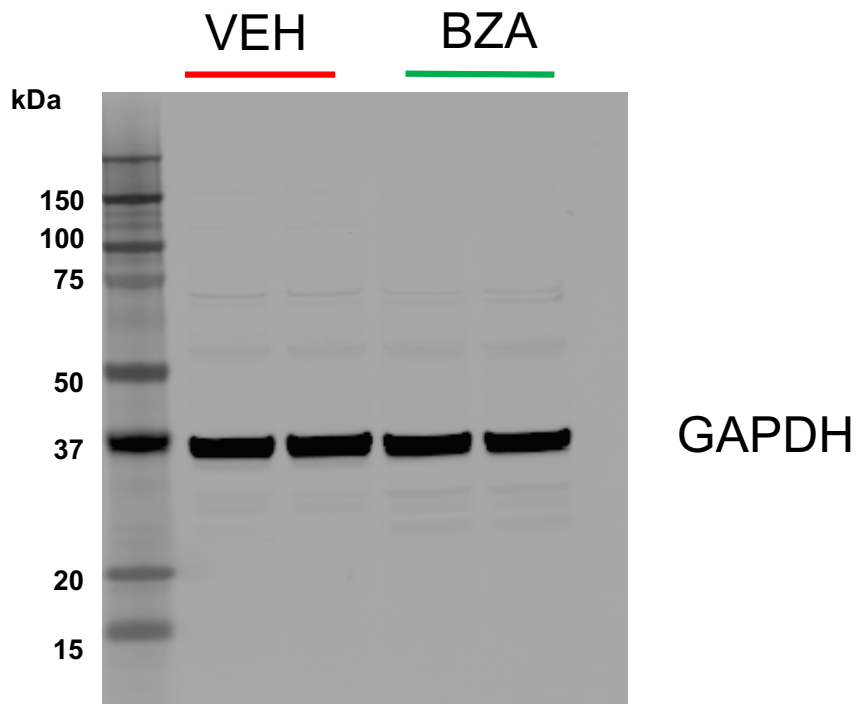

Thilakasiri *et al* **Figure 5G** Western blot images of Cdx2<sup>CRE</sup>APC<sup>fllox</sup> tumour lysates

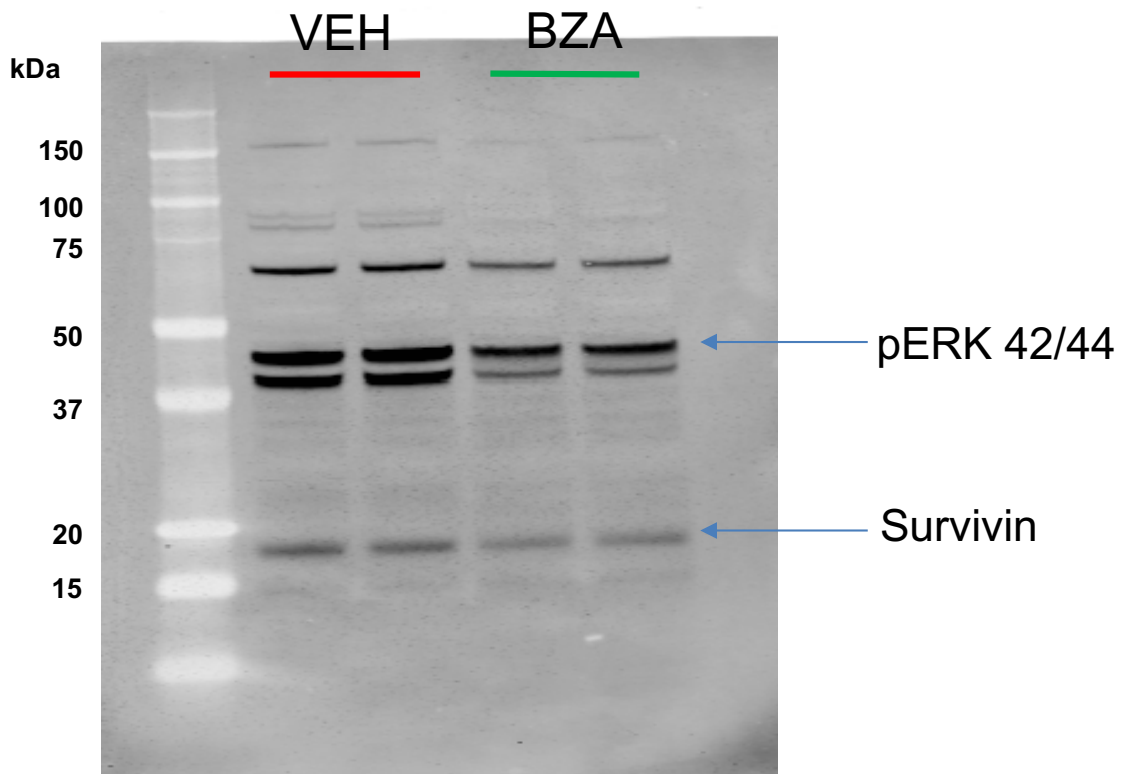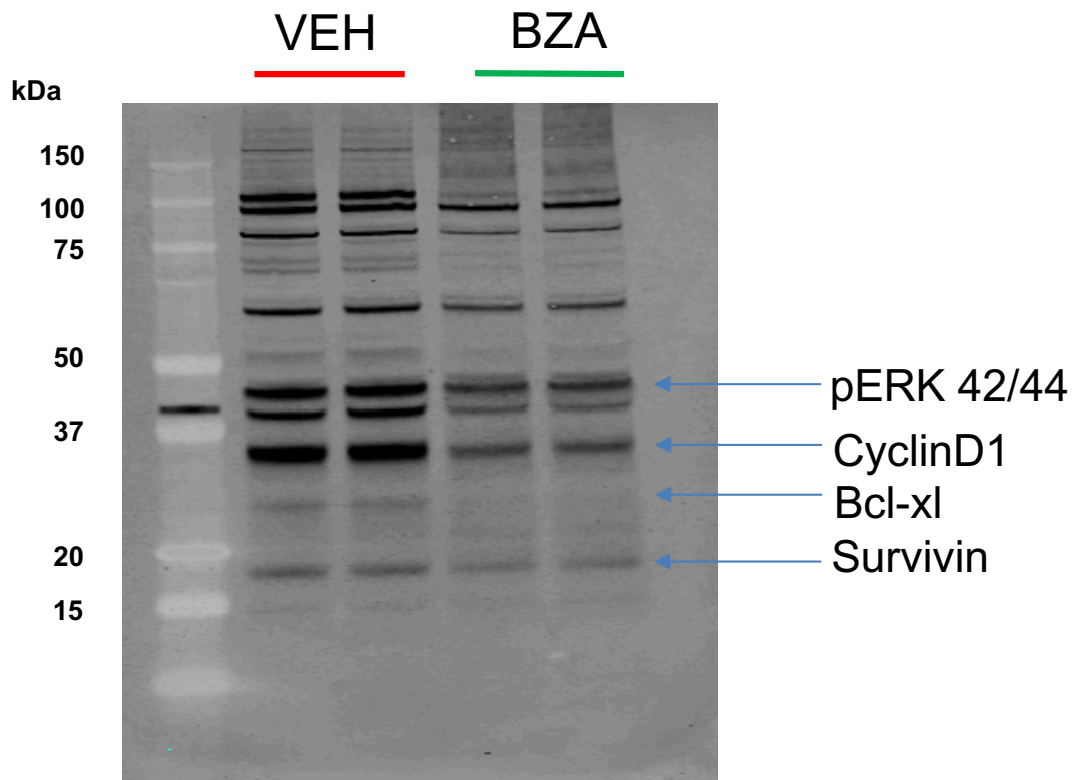

Thilakasiri *et al* **Figure 5G** Western blot images of Cdx2<sup>CRE</sup>APC<sup>fl</sup>ox tumour lysates

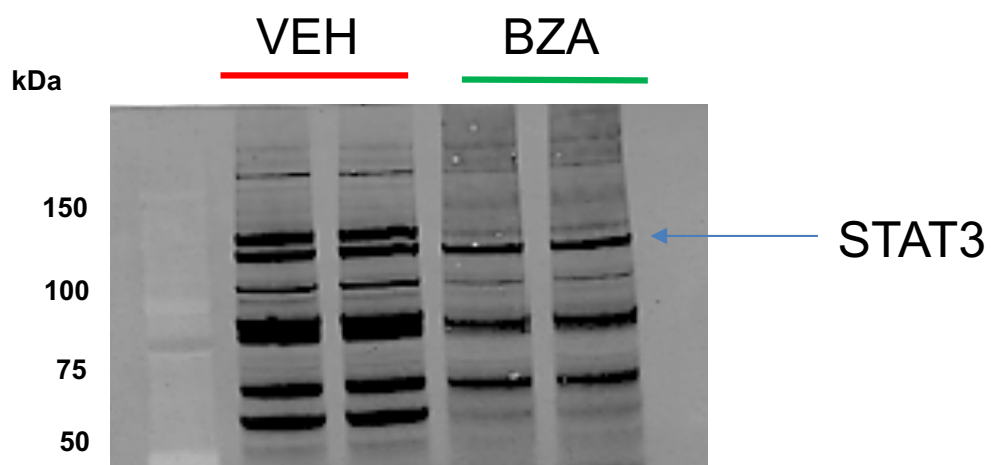

Thilakasiri *et al* **Figure 5G** Western blot images of Cdx2<sup>CRE</sup>APC<sup>fllox</sup> tumour lysates
